# Supplementary figures and images for: The protosteryl and dammarenyl cation dichotomy in polycyclic triterpene biosynthesis revisited: has this ‘rule’ finally been broken?
Source: Royal Society of Chemistry journal article supplement (doi:10.1039/c8np00096d), 2019-01-01

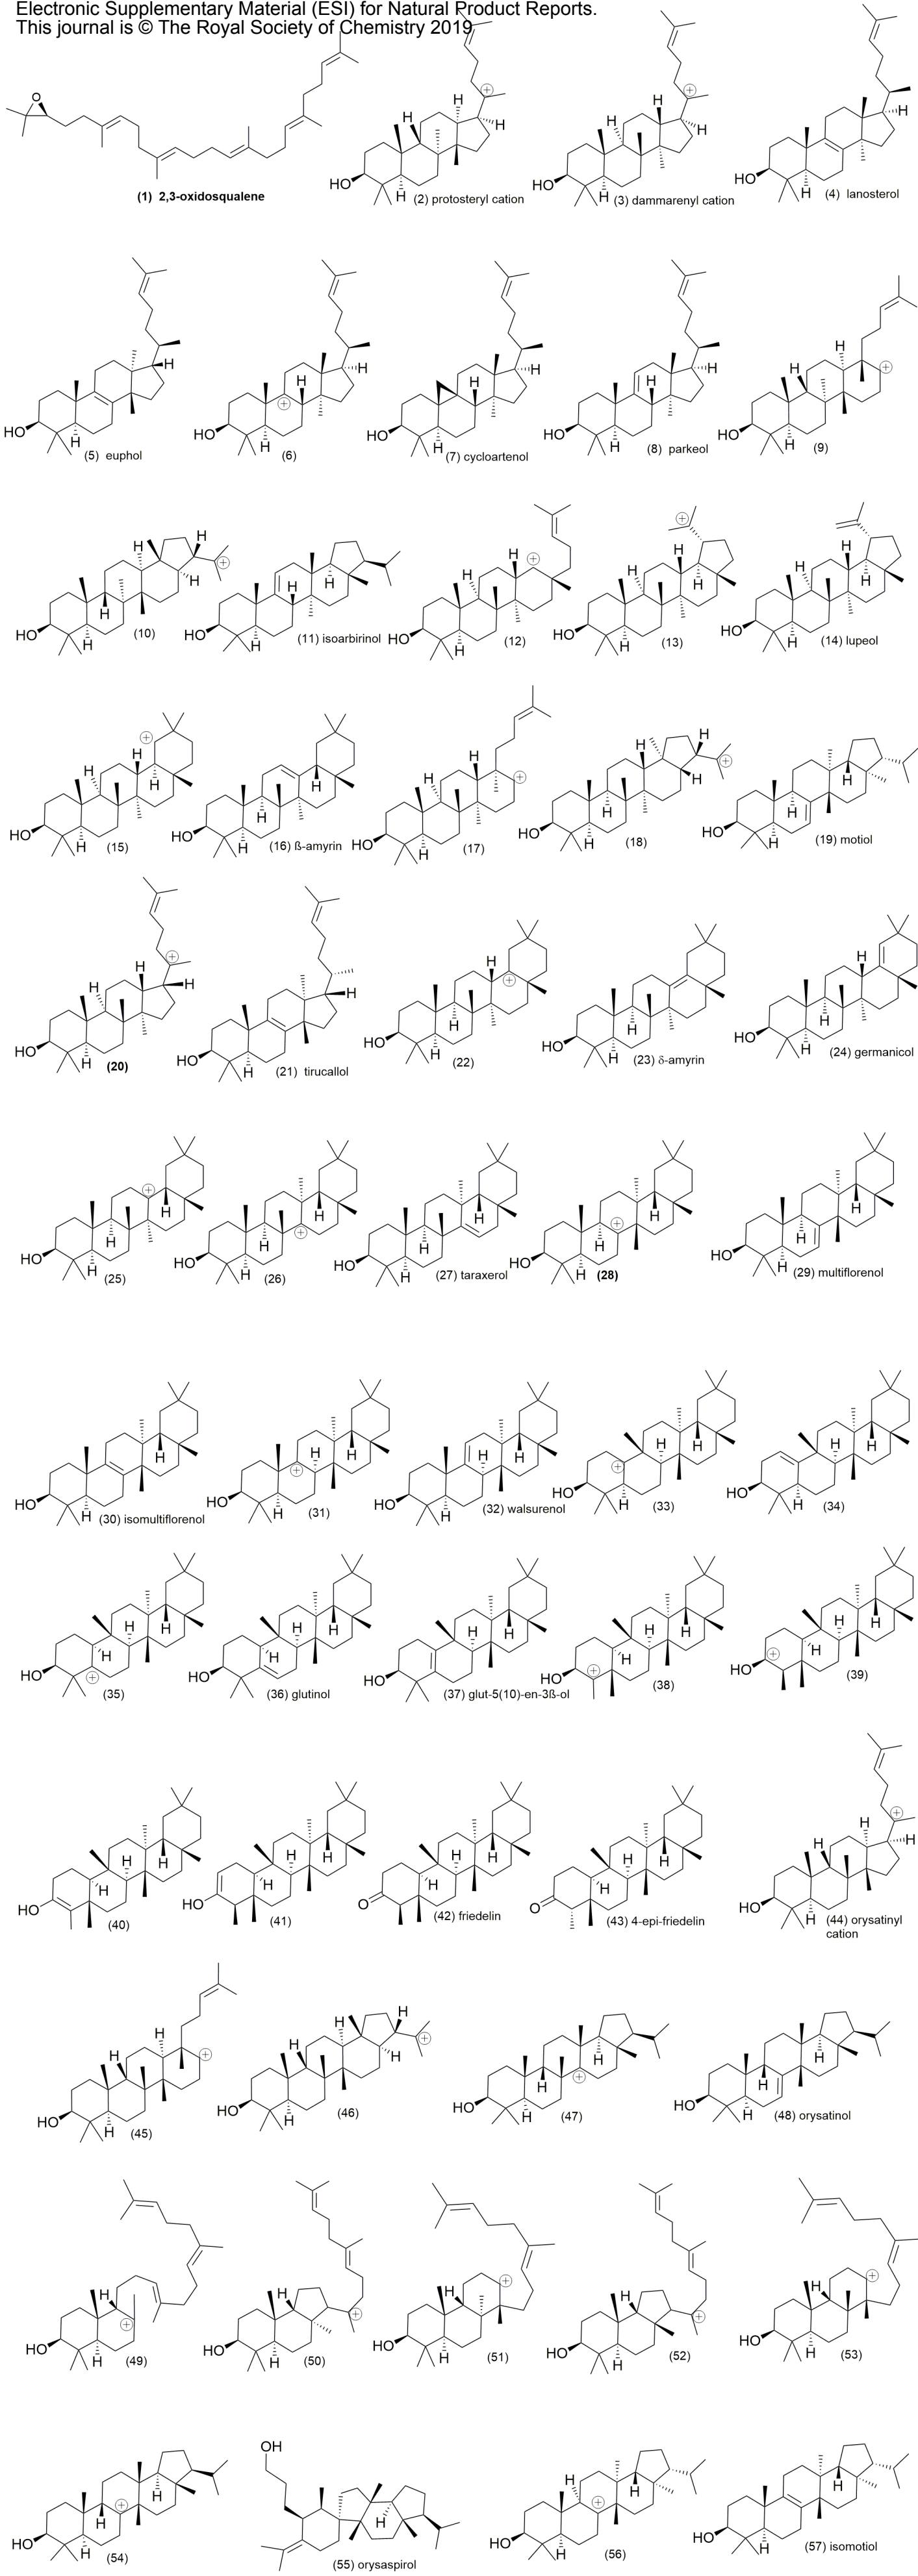

Supplement: c8np00096d1.pdf [file c8np00096d1.pdf]
